# Supplementary material
Source: PubMed Central journal article supplement (PMC6105532)
Supplement: NIHMS935666-supplement-Supplemental_Data_File___doc___tif__pdf__etc__.pdf [file NIHMS935666-supplement-Supplemental_Data_File___doc___tif__pdf__etc__.pdf]

Supplementary Digital Content: 104 Target Ear Diseases from Kleindienst et al. (2016)

|                                                             |                                              |
|-------------------------------------------------------------|----------------------------------------------|
| Acute external otitis                                       | Degenerative arthritis of ossicular joints   |
| Acute mastoiditis                                           | Dementia (non-Alzheimer's)                   |
| Acute myringitis                                            | Diabetes                                     |
| Acute otitis media                                          | Dimeric membrane                             |
| Acute petrositis (Gradenigo)                                | Endolymphatic hydrops                        |
| Alzheimer's                                                 | Epidermoid carcinoma                         |
| Aminoglycoside                                              | Erythromycin                                 |
| Auricular deformities                                       | Exostoses of external auditory canal         |
| Automobile air bag                                          | Facial Neuroma                               |
| Barotitis                                                   | False fundus                                 |
| Benign Neoplasms                                            | Fibrous dysplasia                            |
| Cerebellar infarction                                       | Fluctuant SNHL                               |
| Cholesterol granuloma                                       | Fracture of temporal bone                    |
| Chronic active otitis media                                 | Fungal infections of temporal bone           |
| Chronic external otitis                                     | Giant cell arteritis                         |
| Chronic myringitis                                          | Glandular neoplasms                          |
| Chronic petrositis                                          | Glomus body                                  |
| Cisplatin                                                   | Hemolabyrinth                                |
| Cogan's syndrome                                            | Hemotympanum                                 |
| Complications of chronic active OM-<br>Cholesteatoma        | Idiopathic sudden sensorineural hearing loss |
| Complications of chronic active OM- Facial<br>paresis       | Inferior pontine syndromes                   |
| Complications of chronic active OM-<br>Labyrinth fistula    | Intracranial hemorrhage                      |
| Complications of chronic active OM-<br>Ossicular resorption | Irradiation                                  |
| Congenital aural atresia                                    | Labyrinthine concussion                      |
| Congenital cholesteatoma                                    | Langerhans cell histiocytosis                |
|                                                             | Large vestibular aqueduct                    |
|                                                             | Leukemia                                     |

Loop diuretics  
Lymphoma  
Lymphomatoid granulomatosis  
Major vessels  
Malignant external otitis  
Metastatic neoplasms (Breast, kidney, lung, stomach, larynx, prostate, thyroid)  
Multiple myeloma  
Multiple sclerosis  
Naproxen  
Neurofibromatosis 1  
Neurofibromatosis 2  
Occlusion of AICA  
Occlusion of PICA (Wallenberg)  
Opioid + acetaminophen combination  
Osteogenesis imperfecta  
Other lesions CPA  
Otitic hydrocephalus  
Otitic meningitis  
Otitis media with effusion  
Otosclerosis  
Otosyphilis  
Paget's disease  
Penetrating injury  
Perforation  
Perilymph gusher  
Perilymph fistula  
Peripheral vascular disease  
Petrification of auricle  
Polyarteritis nodosa  
Polycythemia vera  
Primary autoimmune hearing loss  
Quinine & chloroquine  
Relapsing polychondritis  
Retraction  
Rheumatoid arthritis  
Salicylates  
Sarcoma  
Serous / toxic labyrinthitis  
Sinus thrombophlebitis  
Spontaneous CSF leak  
Stroke  
Subarachnoid hemorrhage  
Sudden HL of vascular etiology  
Suppurative labyrinthitis  
Susac's syndrome  
Systemic lupus erythematosus  
Tuberculous otitis media  
Tympanosclerosis  
Vestibular schwannoma  
Vogt-Koyanagi-Harada syndrome  
Waldenstrom's macroglobulinemia  
Wegener's granulomatosis
